# Supplementary material
Source: PubMed Central journal article supplement (PMC5286937)
Supplement: 2016.151514.XIN_SUPPL.pdf [file 2016.151514.XIN_SUPPL.pdf]

## Necroptosis in spontaneously-mutated hematopoietic cells induces autoimmune bone marrow failure in mice

Junping Xin,<sup>1,2,3</sup> Peter Breslin,<sup>1,4,5</sup> Wei Wei,<sup>1</sup> Jing Li,<sup>6</sup> Rafael Gutierrez,<sup>1</sup> Joseph Cannova,<sup>1</sup> Allen Ni,<sup>1</sup> Grace Ng,<sup>1</sup> Rachel Schmidt,<sup>1</sup> Haiyan Chen,<sup>7</sup> Vamsi Parini,<sup>7</sup> Paul C. Kuo,<sup>1</sup> Ameet R. Kini,<sup>7</sup> Patrick Stiff,<sup>1</sup> Jiang Zhu<sup>8</sup> and Jiwang Zhang<sup>1,7</sup>

<sup>1</sup>Oncology Institute, Cardinal Bernardin Cancer Center, Loyola University Medical Center, Maywood, IL, USA; <sup>2</sup>Research and Development Service, Hines VA Hospital, Hines, IL, USA; <sup>3</sup>Department of Molecular Pharmacology and Therapeutics, Loyola University Medical Center, Maywood, IL, USA; <sup>4</sup>Department of Biology, Loyola University Chicago, IL, USA; <sup>5</sup>Department of Molecular/Cellular Physiology, Loyola University Medical Center, Maywood, IL, USA; <sup>6</sup>Department of Biology, College of Life and Environment Science, Shanghai Normal University, P.R. of China; <sup>7</sup>Department of Pathology, Loyola University Medical Center, Maywood, IL, USA and <sup>8</sup>State Key Laboratory for Medical Genomics and Shanghai Institute of Hematology and Collaborative Innovation Center of Hematology, Rui-Jin Hospital; Shanghai Jiao-Tong University School of Medicine, P.R. of China

©2017 Ferrata Storti Foundation. This is an open-access paper. doi:10.3324/haematol.2016.151514

Received: June 27, 2016.

Accepted: September 12, 2016.

Pre-published: September 15, 2016.

Correspondence: [neuroimmune@gmail.com](mailto:neuroimmune@gmail.com)/[jzhang@luc.edu](mailto:jzhang@luc.edu)

---

# **Necroptosis in spontaneously-mutated hematopoietic cells induces autoimmune bone marrow failure in mice**

Junping Xin<sup>1,2,3,#</sup>, Peter Breslin<sup>1,4,5</sup>, Wei Wei<sup>1</sup>, Jing Li<sup>6</sup>, Rafael Gutierrez<sup>1</sup>, Joseph Cannova<sup>1</sup>, Allen Ni<sup>1</sup>, Grace Ng<sup>1</sup>, Rachel Schmidt<sup>1</sup>, Haiyan Chen<sup>7</sup>, Vamsi Parini<sup>7</sup>, Paul C. Kuo<sup>1</sup>, Ameet R. Kini<sup>7</sup>, Patrick Stiff<sup>1</sup>, Jiang Zhu<sup>8</sup>, Jiwang Zhang<sup>1,7,#</sup>

<sup>1</sup> Oncology Institute, Cardinal Bernardin Cancer Center, Loyola University Medical Center, Maywood, IL. 60153

<sup>2</sup> Research and Development Service, Hines VA Hospital, Hines, IL 60153

<sup>3</sup> Department of Molecular Pharmacology and Therapeutics, Loyola University Medical Center, Maywood, IL 60153

<sup>4</sup> Department of Biology, Loyola University Chicago, Chicago, IL 60660

<sup>5</sup> Department of Molecular/Cellular Physiology, Loyola University Medical Center, Maywood., IL 60153

<sup>6</sup> Department of Biology, College of Life and Environment Science, Shanghai Normal University, Shanghai, People's Republic of China.

<sup>7</sup> Department of Pathology, Loyola University Medical Center, Maywood, IL 60153

<sup>8</sup> State Key Laboratory for Medical Genomics and Shanghai Institute of Hematology and Collaborative Innovation Center of Hematology; Rui-Jin Hospital; Shanghai Jiao-Tong University School of Medicine, Shanghai, People's Republic of China

Correspondence: #Junping Xin ([neuroimmune@gmail.com](mailto:neuroimmune@gmail.com)) and Jiwang Zhang ([jzhang@luc.edu](mailto:jzhang@luc.edu))

**Table 1. Characteristic features of transgenic mice**

| Mouse strain                                                 | Growth                                                       | Reproductivity (pups/litter)       | Life span                        |                 |
|--------------------------------------------------------------|--------------------------------------------------------------|------------------------------------|----------------------------------|-----------------|
| <i>Cre</i> <sup>-</sup>                                      | <i>Tak1<sup>ff</sup></i>                                     | Normal                             | Normal (6-10)                    | >2 years        |
|                                                              | <i>Tak1<sup>ff</sup>Tnfr<sup>-/-</sup></i>                   | Normal                             | Normal (6-10)                    | >2 years        |
|                                                              | <i>Tak1<sup>ff</sup>Tnfr<sup>-/-</sup>Ifnγ<sup>-/-</sup></i> | Normal                             | Normal (6-10)                    | >2 years        |
|                                                              | <i>Tak1<sup>ff</sup>Tnfr<sup>-/-</sup>Rip3<sup>-/-</sup></i> | Normal                             | Normal (6-10)                    | >2 years        |
| <i>Cre</i> <sup>+</sup>                                      | <i>Tak1<sup>ff</sup></i>                                     | Generally normal before 8 month    | Normal (6-10) before 8 month old | 14-22 months    |
|                                                              | <i>Tak1<sup>ff</sup>Tnfr<sup>-/-</sup></i>                   | Stop gaining BW at 2 mos. of age   | No                               | 3-7 months      |
|                                                              | <i>Tak1<sup>ff/+</sup>Tnfr<sup>-/-</sup></i>                 | Normal                             | Normal, used to breed            | >2 years        |
|                                                              | <i>Tak1<sup>ff/+</sup>Tnfr<sup>-/-</sup> +anti-CD4</i>       | Regain BW                          | N/D                              | Up to 10 months |
|                                                              | <i>Tak1<sup>ff/+</sup>Tnfr<sup>-/-</sup> +IgG</i>            | Do not regain BW                   | N/D                              | 3-7 months      |
|                                                              | <i>Tak1<sup>ff</sup>Tnfr<sup>-/-</sup>Ifnγ<sup>-/-</sup></i> | Normal                             | Normal                           | >1.5 years      |
|                                                              | <i>Tak1<sup>ff</sup>Tnfr<sup>-/-</sup>Ifnγ<sup>+/-</sup></i> | Stop gaining BW at 3-4 mos. of age | No                               | 6-12 months     |
|                                                              | <i>Tak1<sup>ff</sup>Tnfr<sup>-/-</sup>Rip3<sup>-/-</sup></i> | Normal                             | Reduced (1-4)                    | Up to 10 months |
| <i>Tak1<sup>ff</sup>Tnfr<sup>-/-</sup>Rip3<sup>+/-</sup></i> | Stop gaining BW at 2 mos. of age                             | No                                 | 3-7 months                       |                 |

Color codes and abbreviations: no fill=normal; green=normal after intervention; brown=severe BMF; light brown=chronic BMF; BW=body weight; N/D= not determined

## Supplementary Figures with Legends

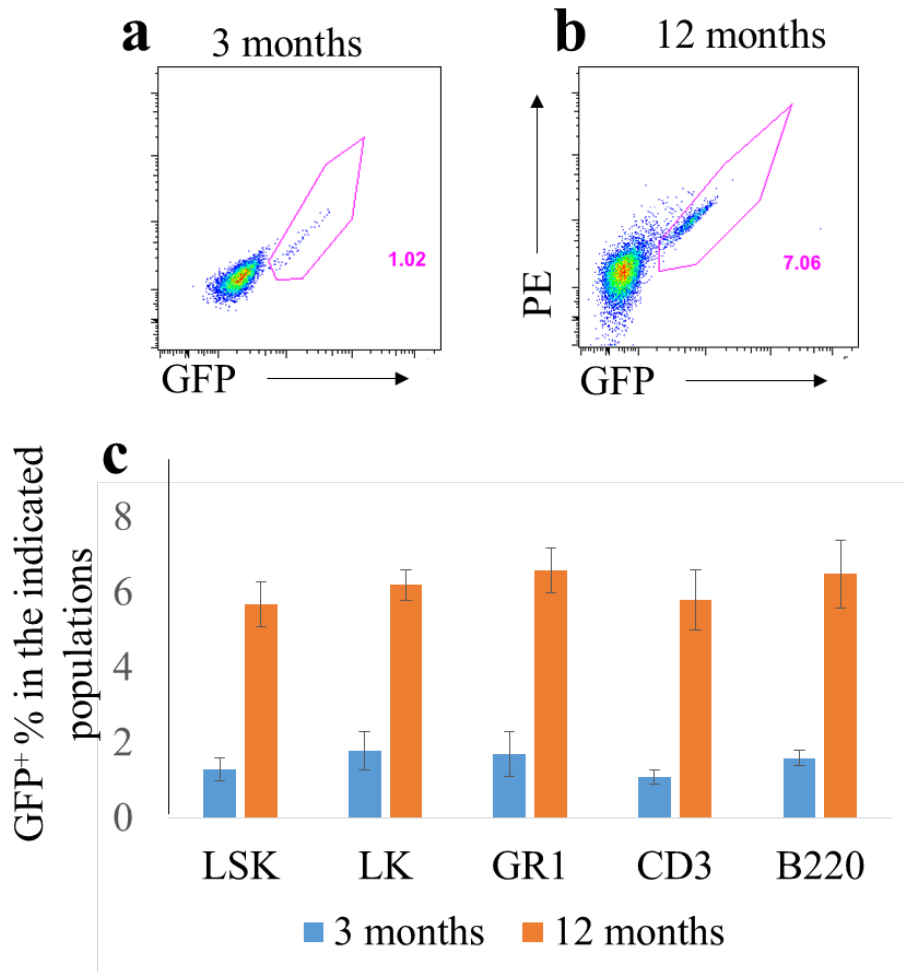

**Figure S1. Linkage of Mx1Cre-induced flox-mediated recombination in BM cells as shown by Rosa-stop-GFP reporter assay.** *Mx1Cre* mice were crossed with *ROSA26-EGFP<sup>f</sup>* mice to generate *Mx1Cre<sup>+</sup>ROSA26-EGFP<sup>f</sup>* mice. GFP expression in these mice reliably reflects the Cre-induced flox-mediated recombination in target cells. Consistent with our previously reported findings<sup>1</sup>, we found that at 3 months of age, 1-3% of GFP can be detected in all lineages of BM cells including LSK HSPCs, LK progenitors, Gr1<sup>+</sup> granulocytes, CD3<sup>+</sup> T cells and B220<sup>+</sup> B cells. The percentage of GFP<sup>+</sup> cells was increased during aging and reached 5-7% at 12 months of age in BM cells. **a** and **b**. Representative flow cytometric data for analysis of GFP<sup>+</sup> cells in BM mononuclear cells at 3 months of age (**a**) and 12 months of age (**b**). **c**. Average GFP<sup>+</sup>% in indicated populations of BM cells at indicated time points. Three mice for each time point were analyzed.

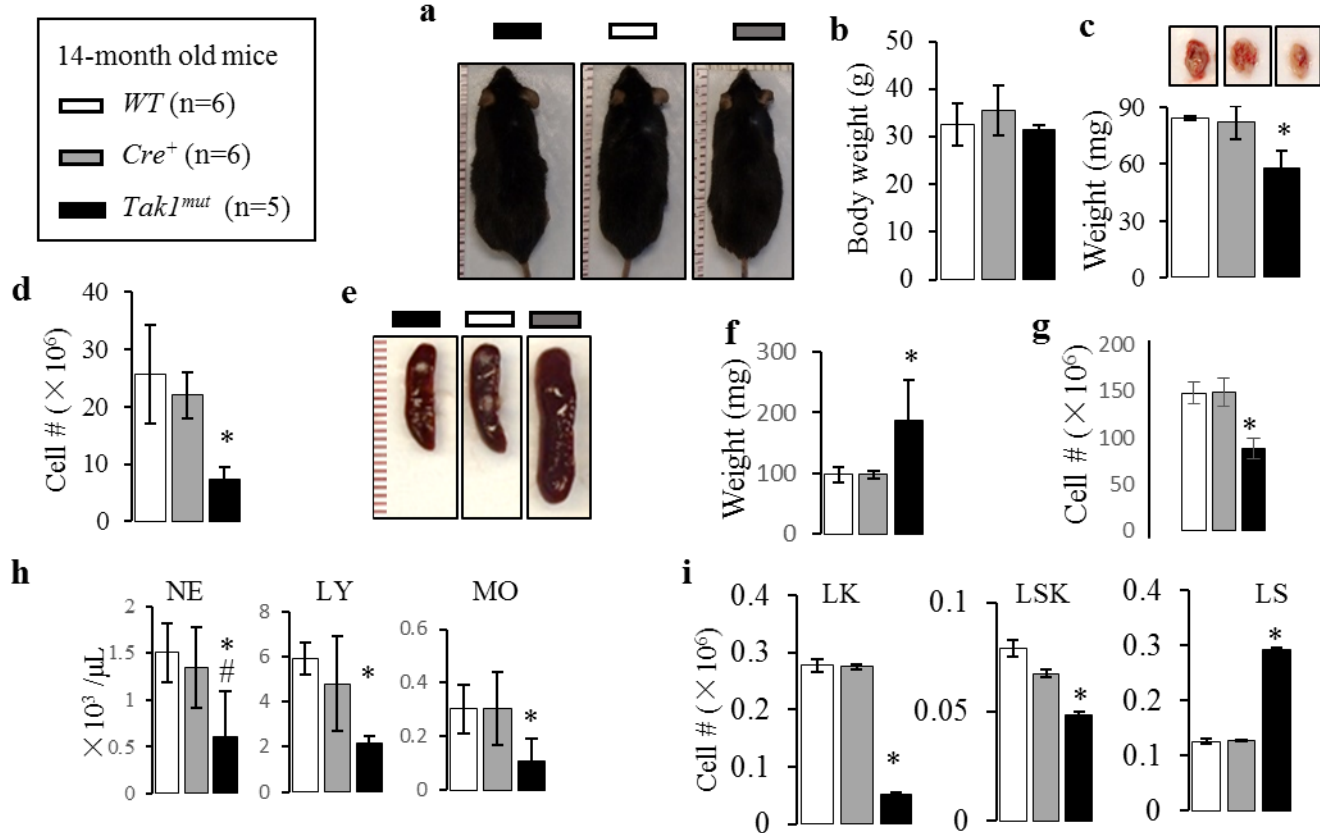

**Figure S2. Spontaneous *Tak1* deletion in HSPCs results in chronic BMF (associated with Figure 1).** *Tak1*<sup>mut</sup> mice and their *WT* and *Cre*<sup>+</sup> littermates were analyzed at age 14 months (n=5~6/group) for overall phenotype (**a**. photographs of body; **b**. body weight) and lymphoid tissues (thymus: **c**. photograph and **d**. weight; spleen: **e**. photograph, **f**. weight and **g**. total nucleated cells). **h**. Numbers of neutrophils (NE), lymphocytes (LY) and monocytes (MO) in peripheral blood. **i**. Absolute numbers of lineage<sup>-</sup>c-kit<sup>+</sup>Sca1<sup>-</sup> (LK), lineage<sup>-</sup>c-kit<sup>+</sup>Sca1<sup>+</sup> (LSK) and lineage<sup>-</sup>c-kit<sup>+</sup>Sca1<sup>+</sup> (LS) populations in bone marrow (BM) from 2 hind legs. Data are presented as means ± SD. \*, p<0.05 compared to *WT* and *Cre*<sup>+</sup> controls.

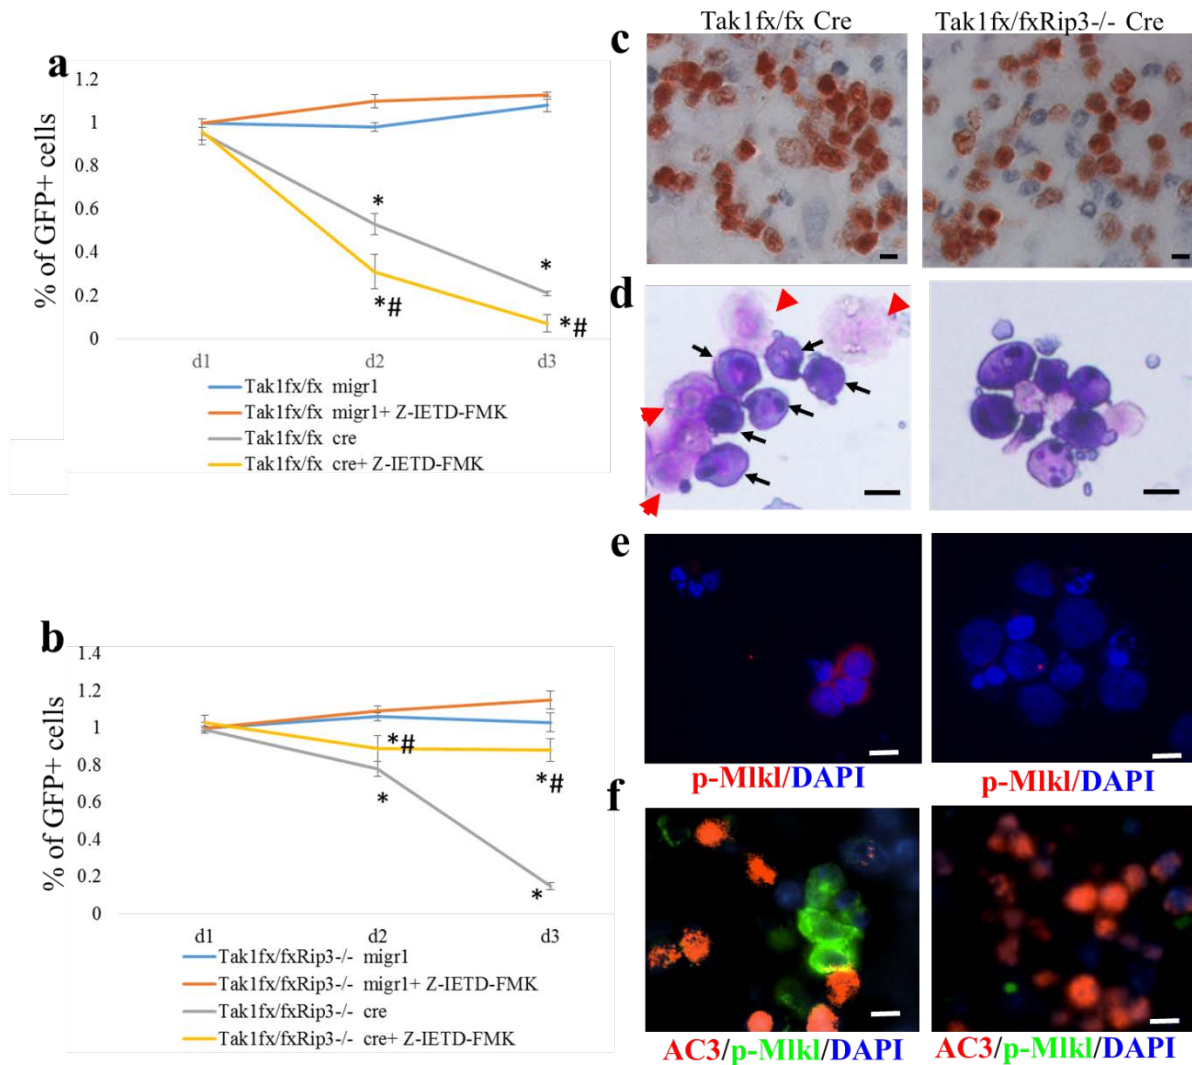

**Figure S3. *Tak1*<sup>-/-</sup> HSPCs die of caspase-mediated apoptosis and Rip3-mediated necroptosis.** *c*-*Kit*<sup>+</sup> HSPCs were isolated from BM of *Tak1<sup>fx/fx</sup>* (**a**) and *Tak1<sup>fx/fx</sup>Rip3<sup>-/-</sup>* mice (**b**) and transduced with MSCV-Cre-GFP. GFP percentages with or without caspase inhibitor Z-IETD-FMK treatment were examined on days 1, 2 and 3 post-transduction. Loss of GFP is attributable to death of the transduced HSPCs. *Tak1*<sup>-/-</sup> HSPCs died of necroptosis when caspase 8 was inhibited (**a**); however *Tak1<sup>fx/fx</sup>Rip3<sup>-/-</sup>* HSPCs die of apoptosis, which can be prevented by inhibition of caspase 8 (Z-IETD-FMK is a caspase 8 inhibitor) (**b**). **c-e**. Twenty hours after transduction, the transduced cells were purified by FACS for GFP<sup>+</sup> and incubated for another 24 hours. Cell death was determined by TUNEL staining (**c**) and Wright's Giemsa staining (**d**, red arrowheads indicate necroptotic cells; black arrows indicate apoptotic cells); necroptosis and apoptosis were further determined by p-Mkl1 staining (a reliable marker for necroptosis) (**e**) or p-Mkl1 and active caspase 3 (AC3) co-staining (**f**). Apoptotic cells with fragmented nuclei were negative for p-Mkl1 (**e**) but positive for AC3. Scale bar=10μm. \* P<0.05 compared to Migr1 transduction. # P<0.05 compared to Cre transduction.

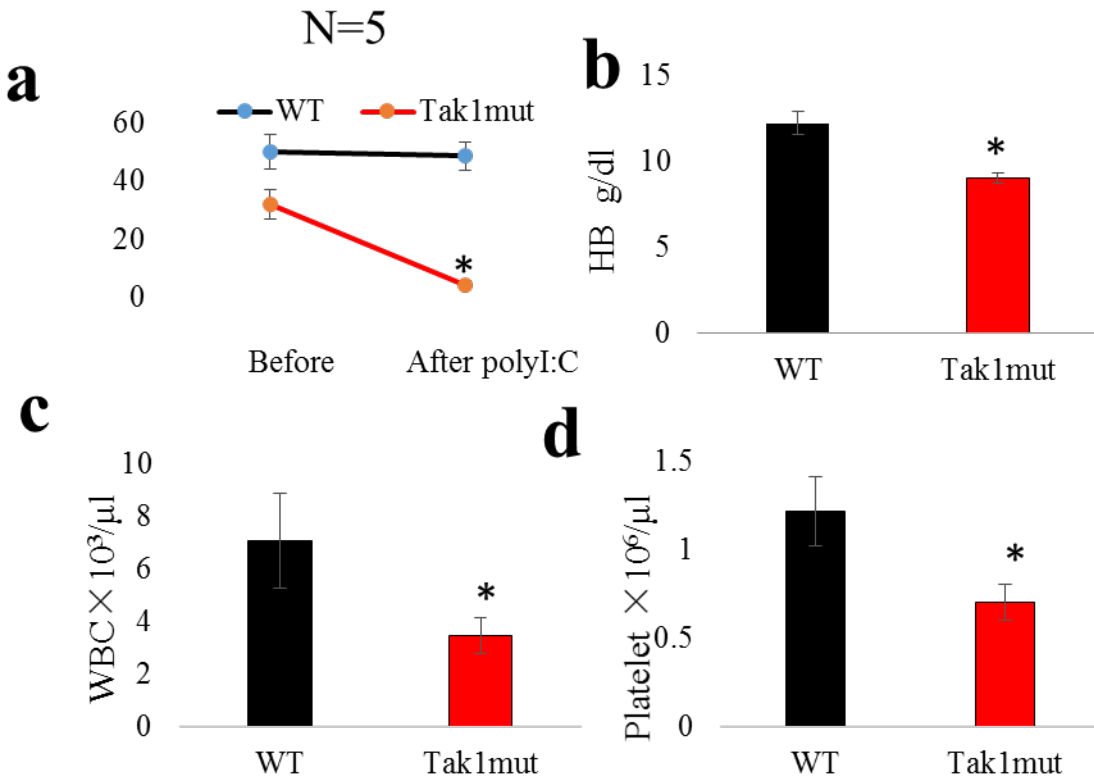

**Fig. S4. Pancytopenic phenotype of WT recipient mice which had received *Tak1<sup>mut</sup>* cell transplantation.** Sub-lethally-irradiated WT recipient mice (CD45.1 background) were transplanted with BM MNCs isolated from *Tak1<sup>mut</sup>* mice or WT littermate controls (CD45.2 background). Five hundred thousand cells were transplanted into each recipient. One month after transplantation, the percentages of donor cells (CD45.2+) in peripheral blood was examined (**a**, before polyI:C). All mice were then injected with polyI:C (1  $\mu\text{g/g}$ . body weight) every other day for total three times. Percentages of donor cells (**a**), HB (hemoglobin concentration, **b**), WBC (**c**) and platelet numbers (**d**) were examined 2 months after polyI:C injection. \*  $P < 0.05$  compared to recipient mice receiving WT BM cells.

14-month old mice

- *WT* (n=6)
- ▒ *Cre*<sup>+</sup> (n=6)
- *Tak1*<sup>mut</sup> (n=5)

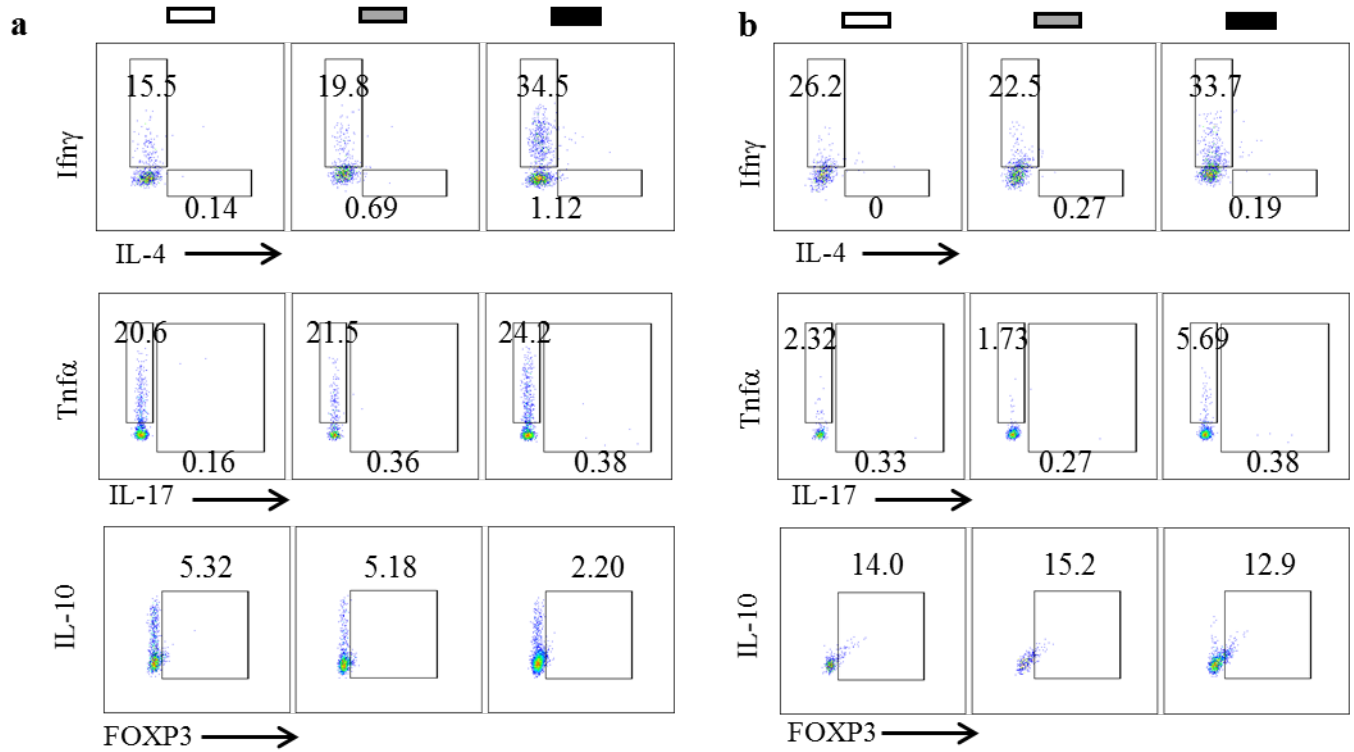

**Figure S5. Enhanced Th1 cell responses in *Tak1*<sup>mut</sup> BMF mice (Associated with Figure 2). a.** Representative flow cytometric plots for analysis of CD4<sup>+</sup> T cell effector subsets (gates: live nucleated cells, lymphocytes, CD3 and CD4). **b.** Representative flow cytometric plots for analysis of CD8<sup>+</sup> T cell effector subsets (gates: live nucleated cells, lymphocytes, CD3 and CD8).



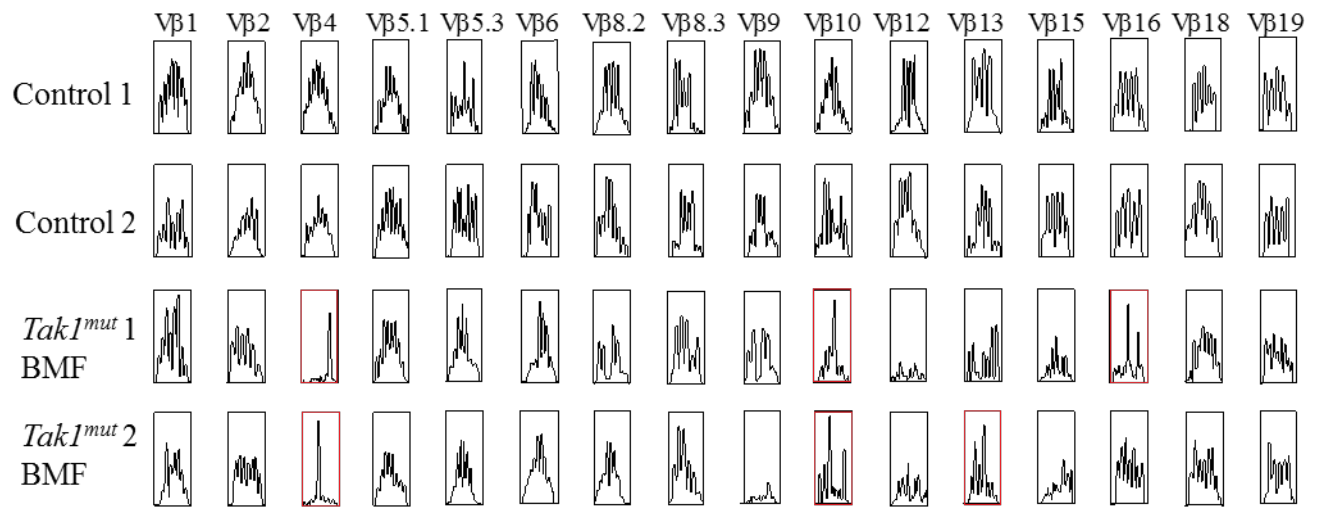

**Fig. S6. TCR repertoire of CD4<sup>+</sup> T cells in *Tak1<sup>mut</sup>* BMF mice was analyzed by run-off PCR assay for Vβ subfamily.** CD4<sup>+</sup> T cells were isolated from *Tak1<sup>mut</sup>* BMF mice and littermate *WT* control mice by positive selection after direct labelling with monoclonal antibodies to CD4 conjugated with magnetic microbeads. CDR3 fragments were amplified by RT-PCR with a fluorescent anti-sense TCR-constant-β (Cβ) common primer and one of 22 Vβ-family-specific sense primers as reported.<sup>2</sup> The composition of Vβ-CDR3 pools was detected as peaks of fluorescence intensity corresponding to particular CDR3 lengths on an ABI310 DNA sequencer. Spectra lacking the Gaussian-like peak distribution with the predominance of just one or two peaks were classified as abnormal (skewed) and suspicious for oligoclonality/monoclonality (highlighted in red).

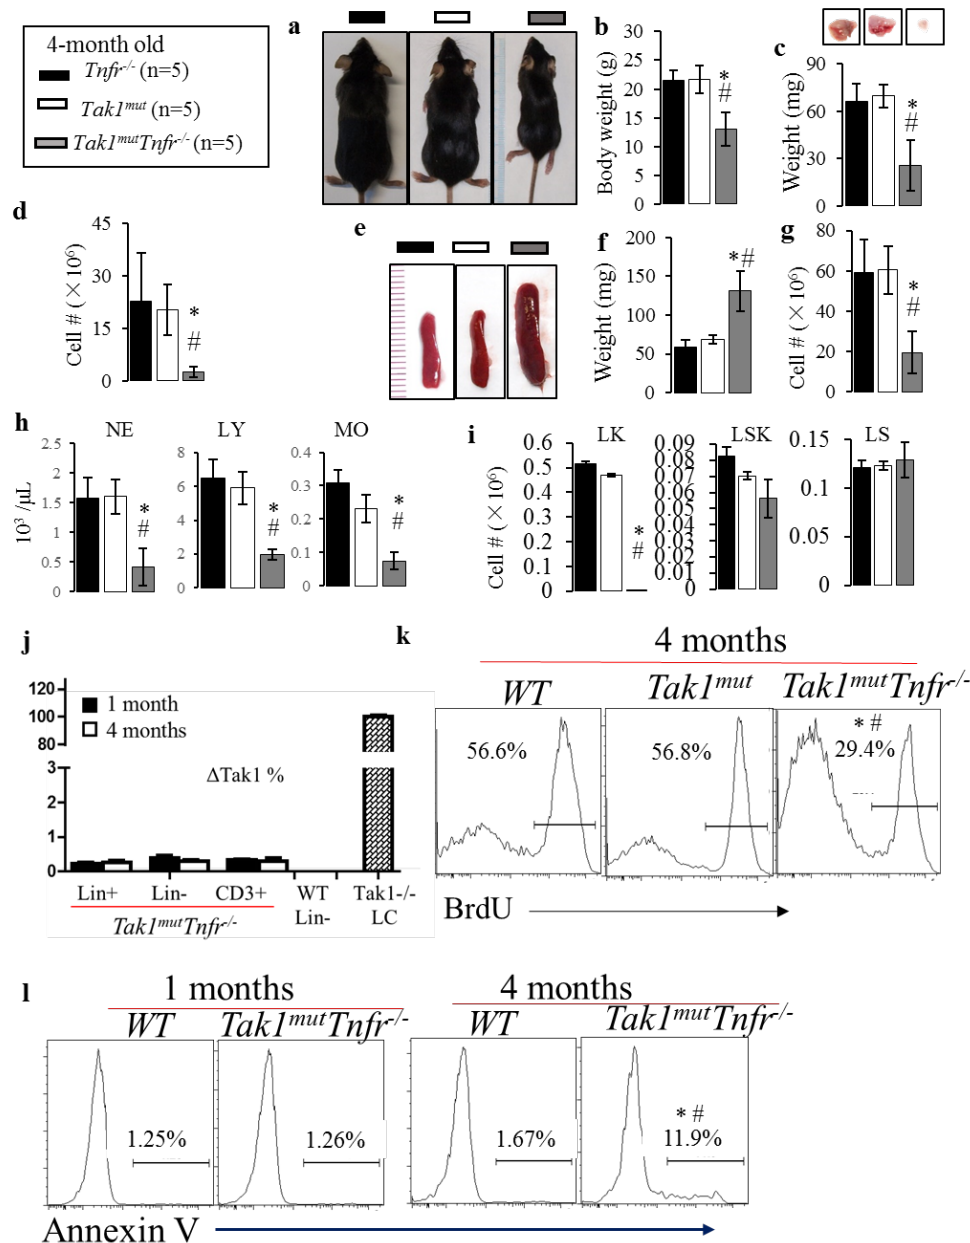

**Figure S7. Tnfr deficiency accelerates BMF in *Tak1<sup>mut</sup>* mice (associated with Fig. 3).** *Tak1<sup>mut</sup>Tnfr<sup>-/-</sup>*, *Tak1<sup>mut</sup>* and *Tnfr<sup>-/-</sup>* mice were analyzed at age 4 months (n=5/group) for overall phenotype (**a**. photographs of body. **b**. body weights) and lymphoid tissues (thymus: **c**. photograph and **d**. weight; spleen: **e**. photograph, **f**. weight and **g**. total nucleated cells). **h**. Numbers of NE, LY and MO in peripheral blood; **i**. Absolute numbers of LK, LSK and LS populations in BM from 2 hind legs. **j**. Percentages of *Tak1* deletion ( $\Delta Tak1$ ) in  $Lin^-$  HSPCs,  $Lin^+$  differentiated BM cells and  $CD3^+$  T lymphocytes in *Tak1<sup>mut</sup>Tnfr<sup>-/-</sup>* mice were examined by quantitative PCR.  $Lin^-$  HSPCs from *WT* mice and *Tak1<sup>-/-</sup>* leukemia cells (LCs) were used as negative and positive controls. **k**. Proliferation of c-kit<sup>+</sup> HSPCs was examined by BrdU pulse labeling and compared among *WT*, *Tak1<sup>mut</sup>* and *Tak1<sup>mut</sup>Tnfr<sup>-/-</sup>* mice at 4 months of age. **l**. Death of c-Kit<sup>+</sup> HSPCs was examined by Annexin-V staining and compared between *WT* and *Tak1<sup>mut</sup>Tnfr<sup>-/-</sup>* mice at the indicated ages. Data are presented as means  $\pm$  SD. \*, p<0.05 compared to *Tnfr<sup>-/-</sup>*; #, p<0.05 compared to *Tak1<sup>mut</sup>* mice.

4-month old  
 ■ *Tnfr*<sup>-/-</sup> (n=5)  
 □ *Tak1*<sup>mut</sup> (n=5)  
 ▒ *Tak1*<sup>mut</sup>*Tnfr*<sup>-/-</sup> (n=5)

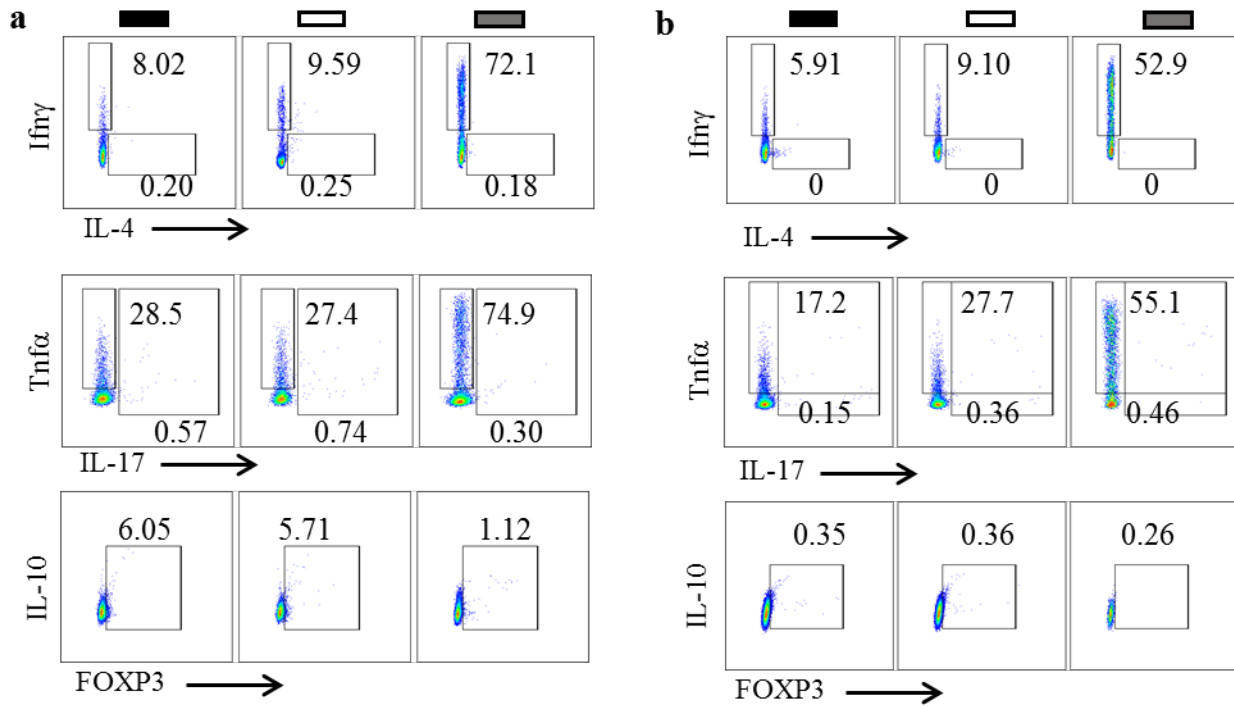

**Figure S8. Tnfr deficiency enhances Th1 cell responses in *Tak1*<sup>mut</sup> mice (associated with Fig. 3).** *Tak1*<sup>mut</sup>*Tnfr*<sup>-/-</sup> and *Tak1*<sup>mut</sup> and *Tnfr*<sup>-/-</sup> mice were analyzed at age 4 months (n=5/group) for T cell analysis. **a.** Representative flow cytometric plots for analysis of CD4<sup>+</sup> T cell effector subsets (gates: live nucleated cells, lymphocytes, CD3 and CD4). **b.** Representative flow cytometric plots for analysis of CD8<sup>+</sup> T cell effector subsets (gates: live nucleated cells, lymphocytes, CD3 and CD8).

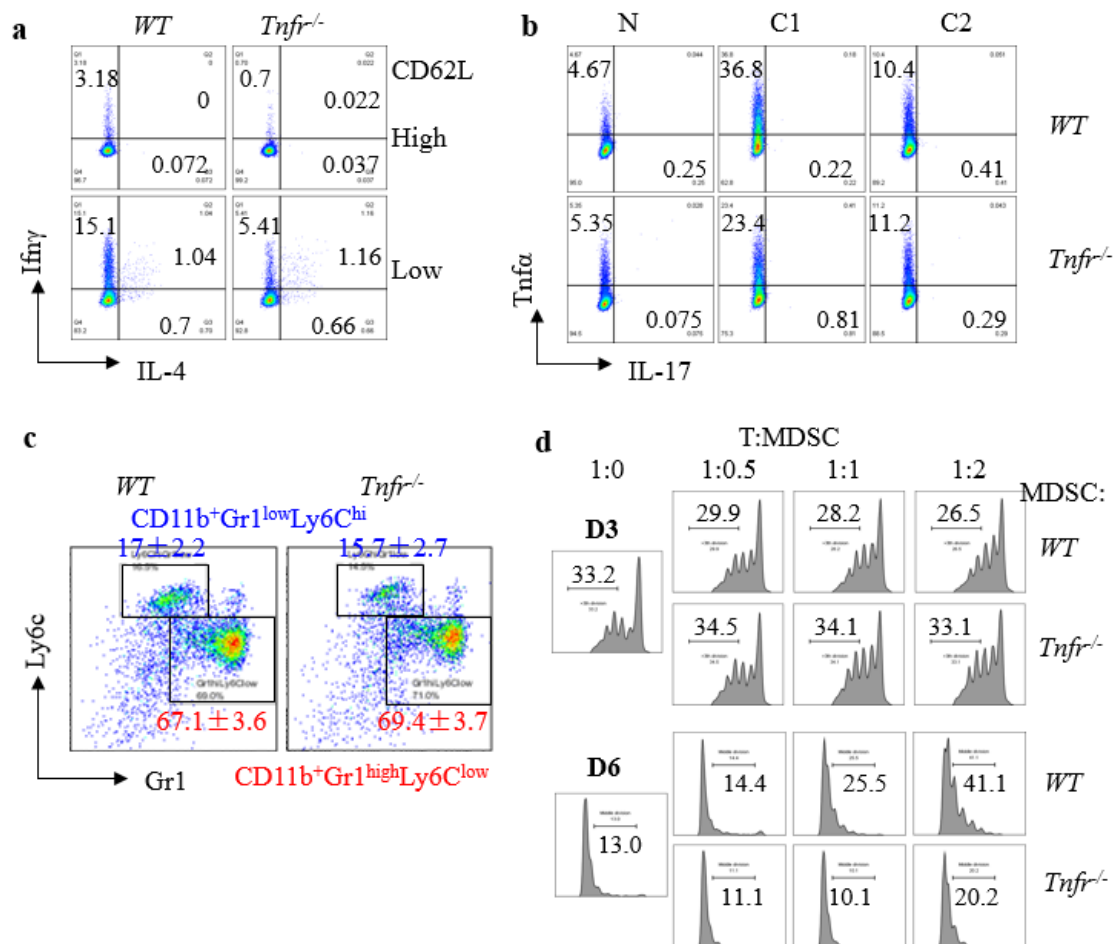

**Figure S9. Deficiency in *Tnfa* signaling enhances the ability of APCs to prime *Ifn- $\gamma$* -expressing T cell development and reduces ability of MDSCs to suppress T cell proliferation (associated with Fig. 4).** **a.** T cells from WT and *Tnfr*<sup>-/-</sup> spleens were first isolated with a pan-T cell isolation kit, then separated with anti-CD62L using AutoMACS. Cells were stimulated with PMA + ionomycin for 6 hours and subjected to intracellular staining for cytokines. **b.** WT CD62L<sup>+</sup> T cells were further cultured with WT and *Tnfr*<sup>-/-</sup> APCs for 6 days under three conditions: neutral condition (N), Th1 condition (C1) and Th2 condition (C2). Cells were collected and subjected to intracellular staining for cytokines. **c.** Bone marrow cells from WT and *Tnfr*<sup>-/-</sup> mice were stained for CD11b, Gr1 and Ly6C and analyzed for CD11b<sup>+</sup>Gr1<sup>low</sup>Ly6C<sup>high</sup> and CD11b<sup>+</sup>Gr1<sup>high</sup>Ly6C<sup>low</sup> MDSCs. **d.** CD11b<sup>+</sup>Gr1<sup>+</sup> cells were sorted from WT and *Tnfr*<sup>-/-</sup> bone marrow and added to anti-CD3-activated and CFSE-labeled WT T cells at indicated ratios and cultured for another 6 days. The CFSE signals were analyzed on days 3 and 6. On day 3, the results were analyzed to show the cells with >3 divisions. On day 6, the results were analyzed to show the cells with a low number of divisions (2-6 divisions). The experiments were repeated independently twice.

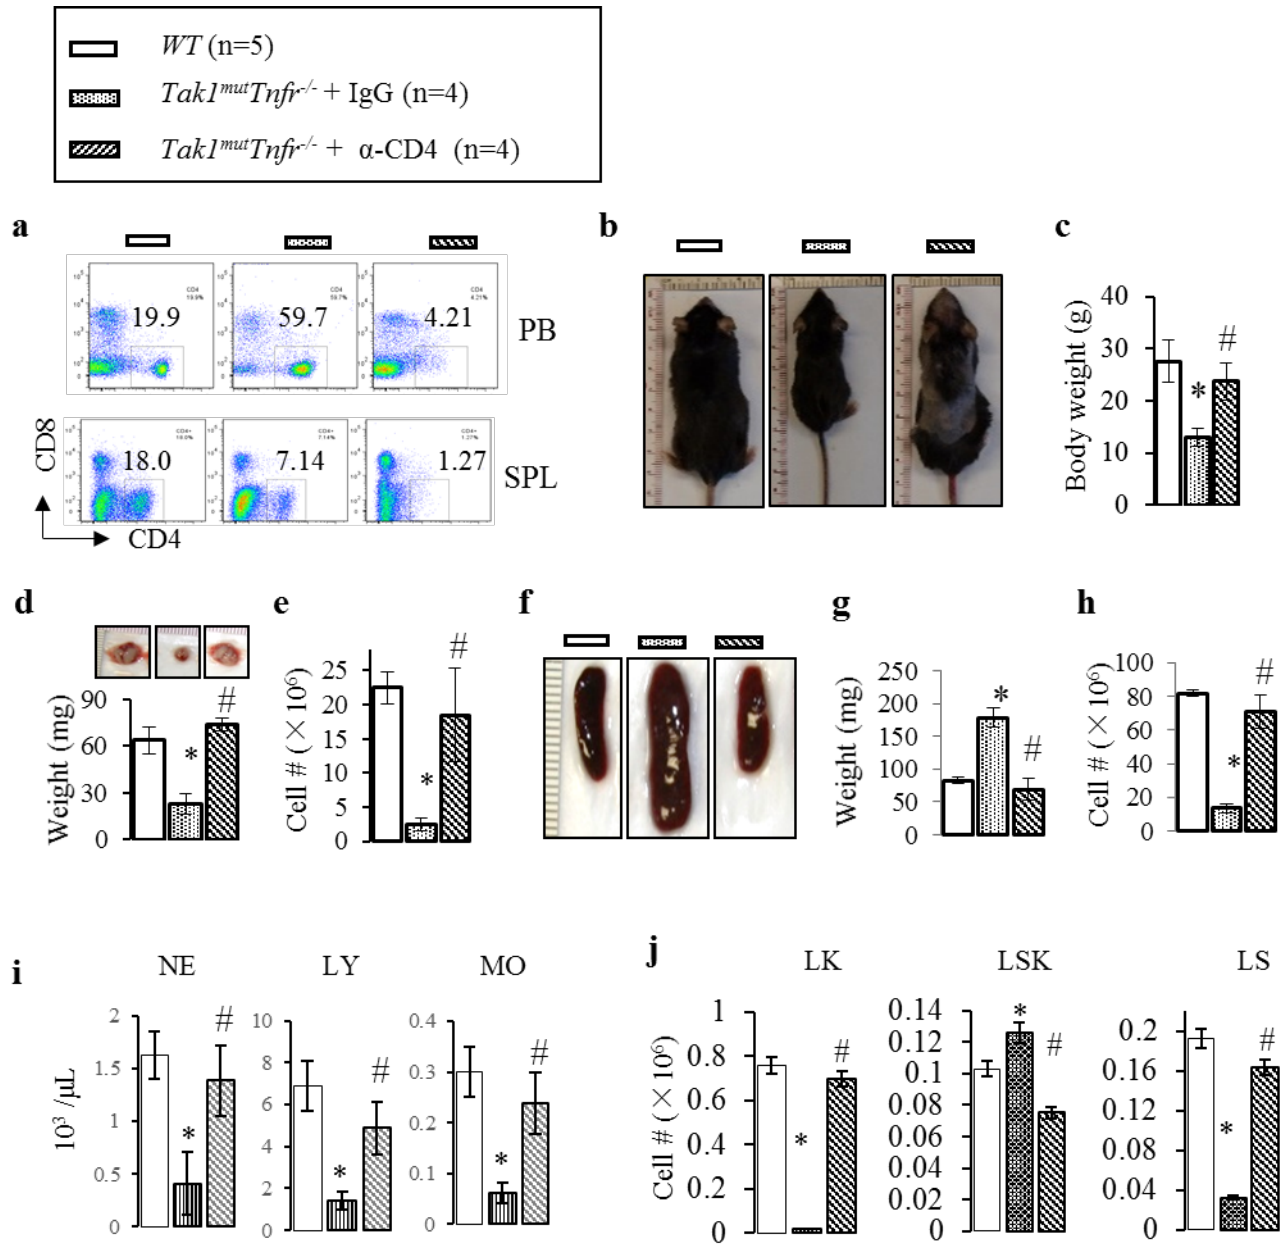

**Figure S10. Depletion of CD4<sup>+</sup> T cells restores normal hematopoiesis to *Tak1<sup>mut</sup>Tnfr<sup>-/-</sup>* mice (associated with Fig. 5).** WT and *Tak1<sup>mut</sup>Tnfr<sup>-/-</sup>* mice treated with either IgG or anti-CD4 antibody (n=5/group) were analyzed at age 10 months (n=5/group) for CD4 depletion in peripheral blood (**a**) as well as overall phenotype (**a**. photographs of body; **b**. body weight) and lymphoid tissues (thymus: **c**. photograph and **d**. weight; spleen: **e**. photograph, **f**. weight and **g**. total nucleated cells). **i**. Numbers of NE, LY and MO in peripheral blood; **j**. Absolute numbers of LK, LSK and LS populations in BM from 2 hind legs. Data are presented as means  $\pm$  SD. \*, p<0.05 compared to WT controls; #, p<0.05 compared to IgG treatment.

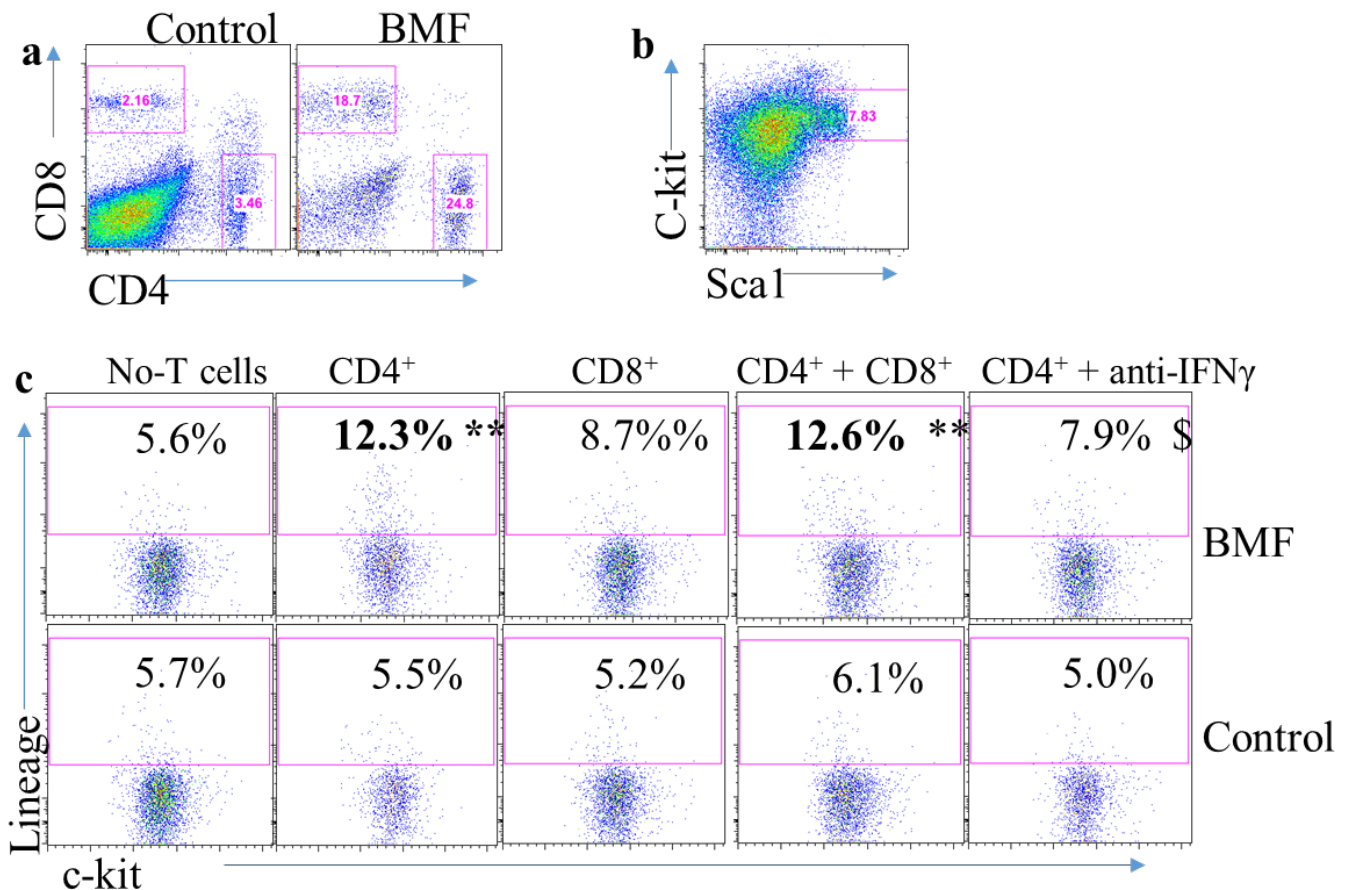

**Figure S11. CD4<sup>+</sup> T cells isolated from BMF mice promoted differentiation of HSPCs *in vivo* by secreting IFN $\gamma$  (associated with Fig. 6).** CD4<sup>+</sup> and CD8<sup>+</sup> T cells were isolated from BMF mice and control mice (a). LSK HSPCs were isolated from BM of WT mice (b). HSPCs and CD4<sup>+</sup> or CD8<sup>+</sup> T cells were co-cultured in a stem cell culture medium (*Stemspan*, supplemented with 100ng/ml SCF, 20ng/ml TPO and 20ng/ml FLT3L) containing 25ng/ml of IL2 with or without anti-Tnf $\gamma$  antibody (20ng/ml) for 5 days. HSPCs in such conditions normally proliferate and maintained an undifferentiated state (c-Kit<sup>+</sup>) with only a small percentage of cells becoming differentiated (become lineage<sup>+</sup>). We found that CD4<sup>+</sup> and CD8<sup>+</sup> cells can only be sustained for 3-4 days without significant expansion. We did not see the direct attack on HSPCs by T cells in any of the experimental groups because there was no significantly increased cell death in the co-culture. After 5 days of co-culture, the number of cells derived from LSK cells were comparable in all experimental groups. However, we observed significantly increased lineage<sup>+</sup> cells in the CD4<sup>+</sup> cells and CD4<sup>+</sup>/CD8<sup>+</sup> cell co-culture groups of BMF mice but not control mice, suggesting CD4<sup>+</sup> T cells from BMF mice promote differentiation of HSPCs. Anti-Tnf $\gamma$  antibody treatment (20ng/ml) can largely prevent such enhanced differentiation in the co-culture, suggesting that CD4<sup>+</sup> T cells from BMF mice promote differentiation of HSPCs through secretion of IFN $\gamma$ .

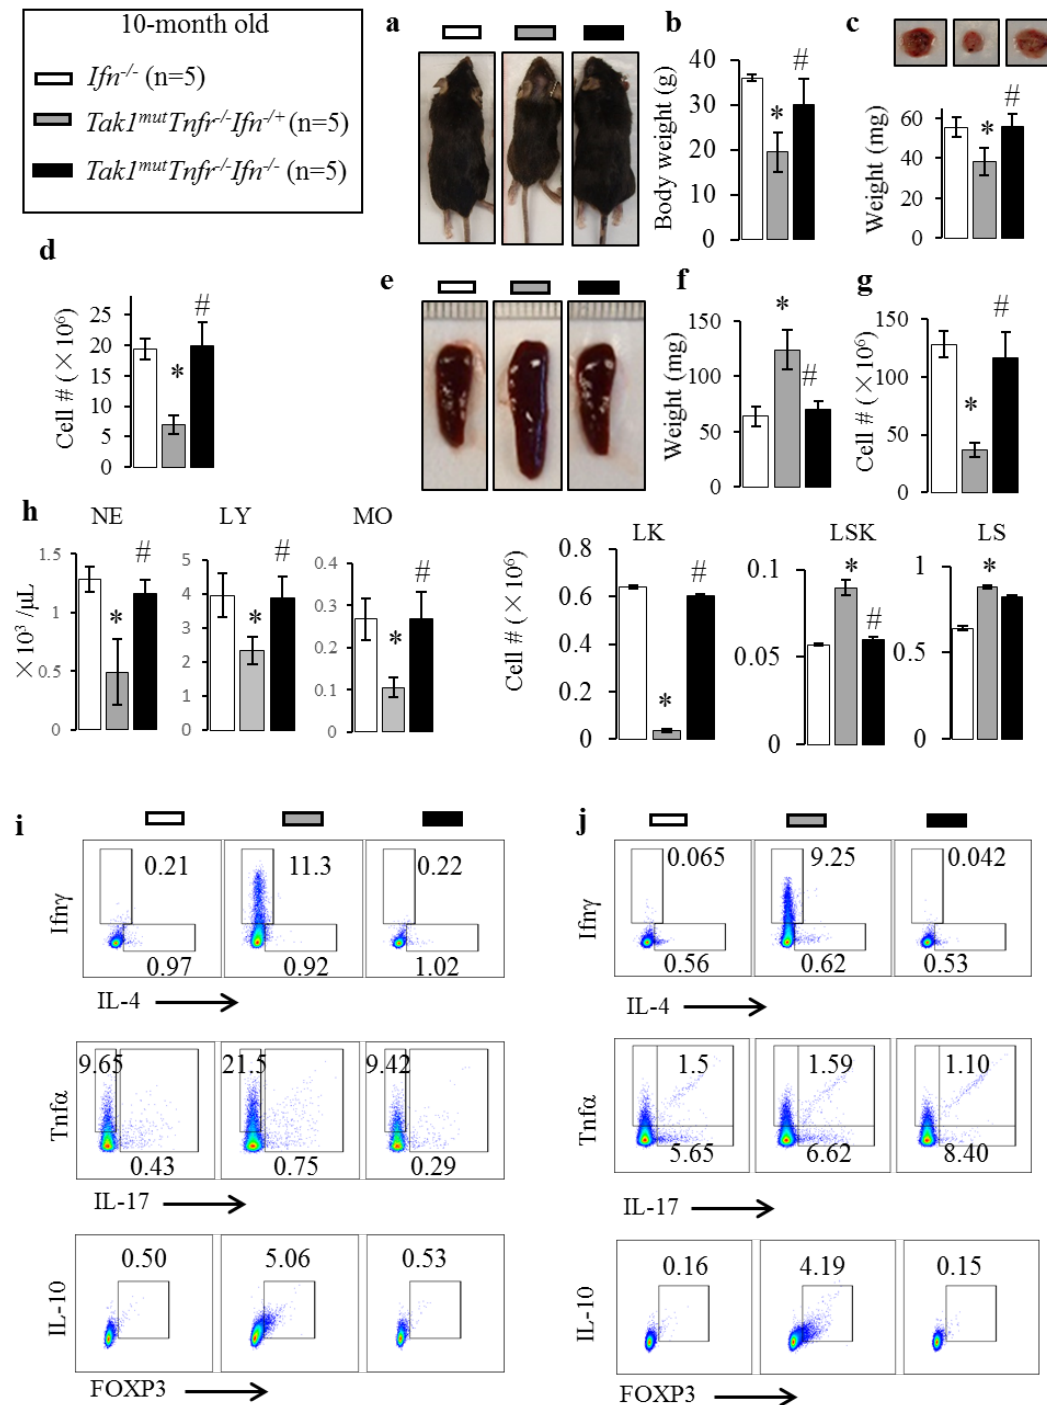

**Figure S12. *Ifn $\gamma$*  knockout prevents BMF in *Tak1<sup>mut</sup>Tnfr<sup>-/-</sup>* mice.** *Ifn $\gamma$ <sup>-/-</sup>*, *Tak1<sup>mut</sup>Tnfr<sup>-/-</sup>Ifn $\gamma$ <sup>+/+</sup>* and *Tak1<sup>mut</sup>Tnfr<sup>-/-</sup>Ifn $\gamma$ <sup>-/-</sup>* mice were analyzed at age 10 months (n=5/group) for overall phenotype (**a**, photographs of body. **b**, body weight) and lymphoid tissues (thymus: **c**, photograph and **d**, weight; spleen: **e**, photograph, **f**, weight and **g**, total nucleated cells). **h**, Numbers of NE, LY and MO in peripheral blood; **i**, Absolute numbers of LK, LSK and LS populations in BM from 2 hind legs. **j**, Representative flow cytometric plots for analysis of CD4<sup>+</sup> T cell effector subsets (gates: live nucleated cells, lymphocytes, CD3 and CD4). **k**, Representative flow cytometric plots for analysis of CD8<sup>+</sup> T cell effector subsets (gates: live nucleated cells, lymphocytes, CD3 and CD8). Data are presented as means  $\pm$  SD. \*, p<0.05 compared to *Tnfr<sup>-/-</sup>* mice; #, p<0.05 compared to *Tak1<sup>mut</sup>Tnfr<sup>-/-</sup>Ifn $\gamma$ <sup>+/+</sup>* mice.

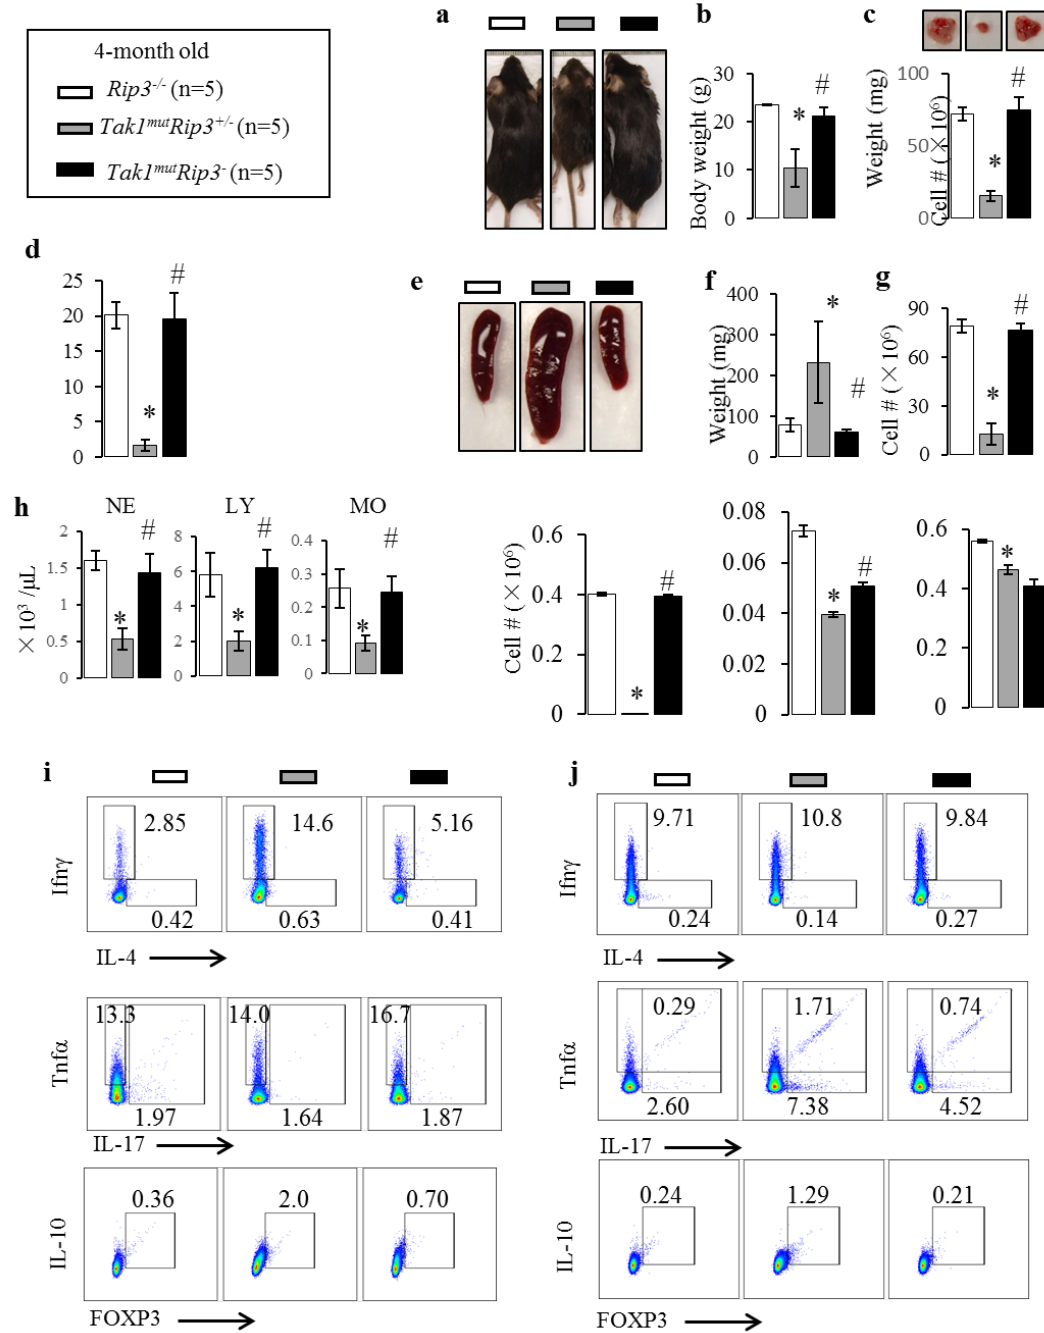

**Figure S13. *Rip3* knockout prevents BMF in *Tak1<sup>mut</sup>Tnfr<sup>-/-</sup>* mice.** *Rip3<sup>-/-</sup>*, *Tak1<sup>mut</sup>Tnfr<sup>-/-</sup>Rip3<sup>+/-</sup>* and *Tak1<sup>mut</sup>Tnfr<sup>-/-</sup>Rip3<sup>-/-</sup>* mice were analyzed at age 4 months (n=5/group) for overall phenotype (**a**, photographs of body. **b**, body weight) and lymphoid tissues (thymus: **c**, photograph and **d**, weight; spleen: **e**, photograph, **f**, weight and **g**, total nucleated cells). **h**, Numbers of NE, LY and MO in peripheral blood; **i**, Absolute numbers of LK, LSK and LS populations in BM from 2 hind legs. **j**, Representative flow cytometric plots for analysis of CD4<sup>+</sup> T cell effector subsets (gates: live nucleated cells, lymphocytes, CD3 and CD4). **k**, Representative flow cytometric plots for analysis of CD8<sup>+</sup> T cell effector subsets (gates: live nucleated cells, lymphocytes, CD3 and CD8). Data are presented as means  $\pm$  SD. \*, p<0.05 compared to *Rip3<sup>-/-</sup>* mice #, p<0.05 compared to *Tak1<sup>mut</sup>Tnfr<sup>-/-</sup>Rip3<sup>+/-</sup>* mice.



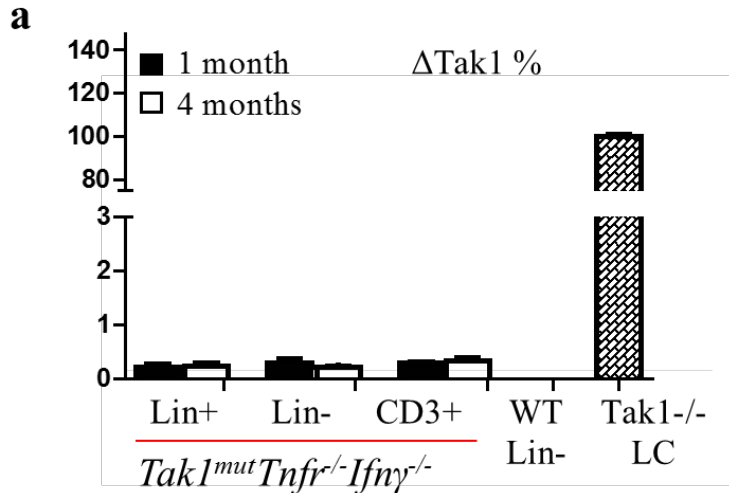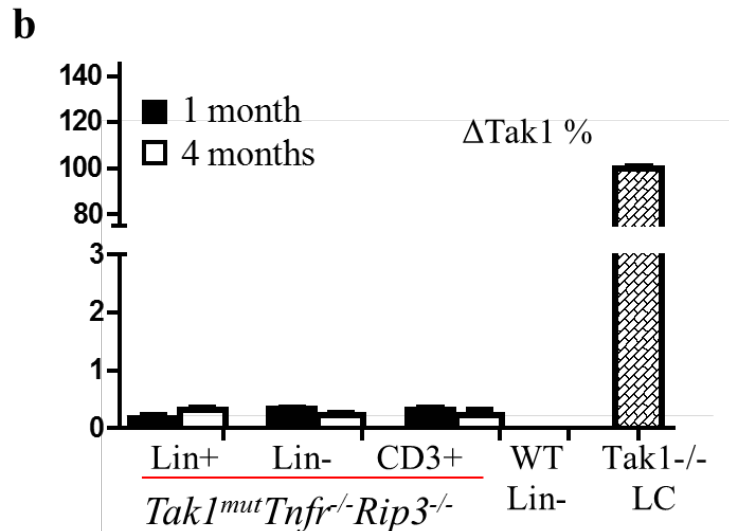

**Figure S14. Percentage of *Tak1* deletion ( $\Delta Tak1$ ) cells in BM of  $Tak1^{mut}Tnfr^{-/-}Ifny^{-/-}$  and  $Tak1^{mut}Tnfr^{-/-}Rip3^{-/-}$  mice at indicated ages.** Percentages of  $\Delta Tak1$  cells in Lin<sup>-</sup> HSPCs, Lin<sup>+</sup> differentiated BM cells and CD3<sup>+</sup> T lymphocytes in  $Tak1^{mut}Tnfr^{-/-}Ifny^{-/-}$  mice (**a**) and  $Tak1^{mut}Tnfr^{-/-}Rip3^{-/-}$  mice (**b**) at indicated ages were examined by quantitative PCR. Lin<sup>-</sup> HSPCs from WT mice and  $Tak1^{-/-}$  leukemia cells (LCs) were used as negative and positive controls.

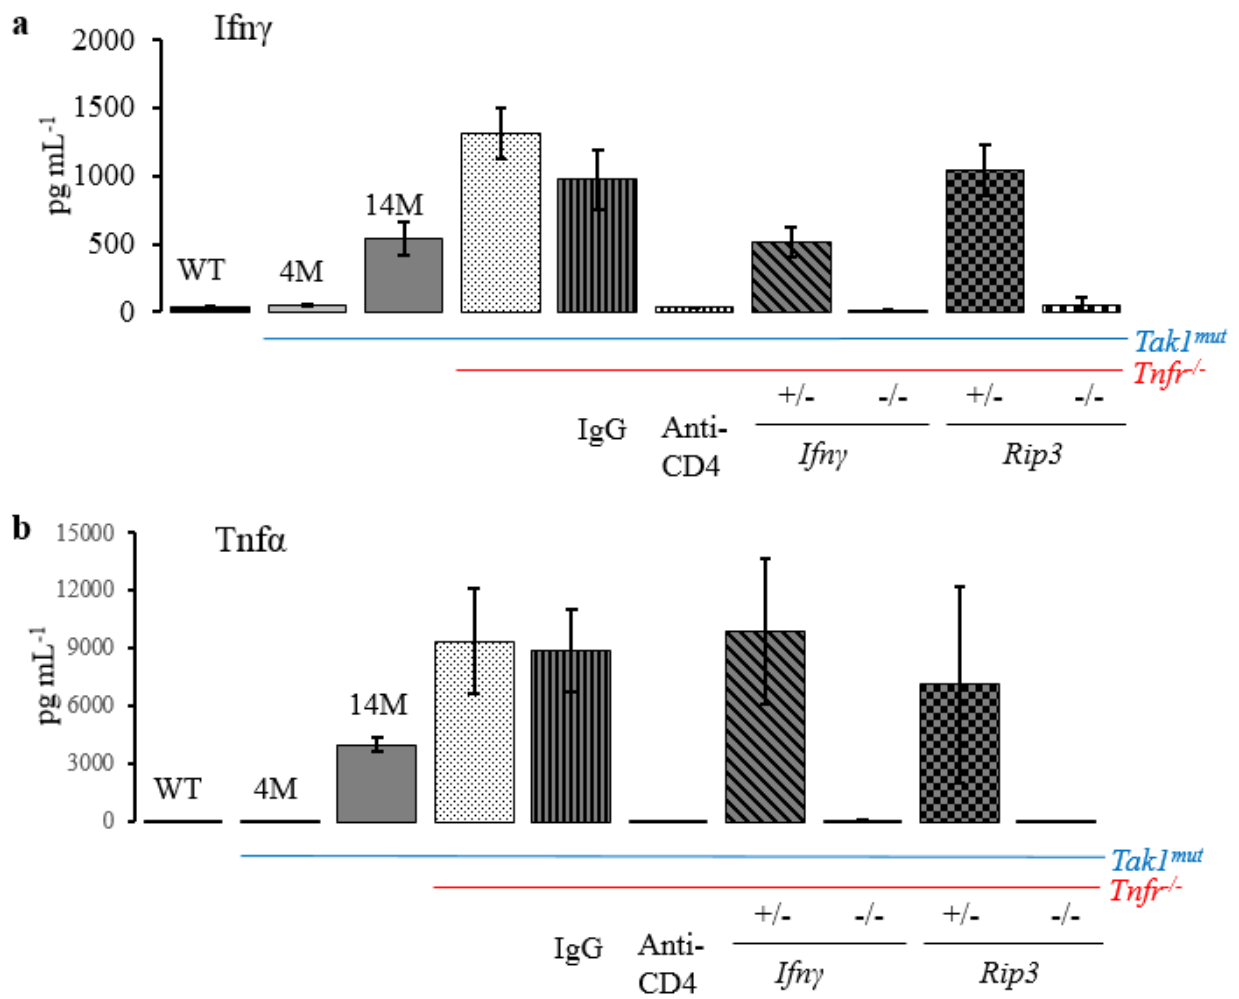

**Figure S15. Serum levels of *Ifn* $\gamma$  and *Tnf* $\alpha$  in experimental mice.** Serum samples were subjected to ELISA for *Ifn* $\gamma$  (a) and *Tnf* $\alpha$  (b) in all types of mouse strains used in the current study.

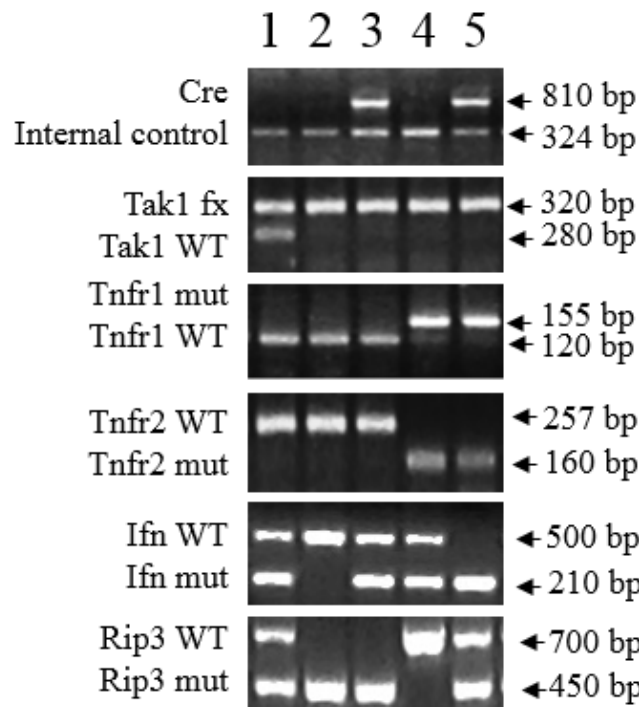

## Readout of PCR results

1. *Cre<sup>-</sup>Tak1<sup>fx/+</sup>Tnfr1<sup>+/+</sup>r2<sup>+/+</sup>Ifn<sup>+/-</sup>Rip3<sup>+/-</sup>*
2. *Cre<sup>-</sup>Tak1<sup>fx/fx</sup>Tnfr1<sup>+/+</sup>r2<sup>+/+</sup>Ifn<sup>+/+</sup>Rip3<sup>-/-</sup>*
3. *Cre<sup>+</sup>Tak1<sup>fx/fx</sup>Tnfr1<sup>+/+</sup>r2<sup>+/+</sup>Ifn<sup>+/-</sup>Rip3<sup>-/-</sup>*
4. *Cre<sup>-</sup>Tak1<sup>fx/fx</sup>Tnfr1<sup>-/-</sup>r2<sup>-/-</sup>Ifn<sup>+/-</sup>Rip3<sup>+/+</sup>*
5. *Cre<sup>+</sup>Tak1<sup>fx/fx</sup>Tnfr1<sup>-/-</sup>r2<sup>-/-</sup>Ifn<sup>-</sup>Rip3<sup>+/-</sup>*

**Figure S16. Genotyping of transgenic and knockout mice.** DNA was extracted from tail snap tissues and mouse genotypes were analyzed by PCR using the primers listed below.

### PCR primers for mouse genotyping:

Cre-1: 5'-CTAGGCCACAGA ATTGAA AGATCT-3';  
 Cre-2: 5'-GTAGGTGGAAATTCTAGCATCATCC -3';  
 Cre-3: 5'-TACCTGGAAAATGCTTCTGT-3';  
 Cre-4: 5'-TGATCTCCGGTATTGAAACT-3';

Primers for Cre-1 and Cre-2 produce an 810bp product in *Cre<sup>+</sup>* mice, and primers for Cre-3 and Cre-4 produce a 324bp product in both *Cre<sup>+</sup>* and *Cre<sup>-</sup>* animals. The latter serve as a PCR amplification control.

Tak1-1: 5'- GGCTTTCATTGTGGAGGTAAGCTGAGA-3';  
 Tak1-2: 5'- GGAACCCGTGGATAAGTGCACCTTGAAT -3';

These primers produce a 280bp product in *WT*, and a 320bp product in *Tak1<sup>fx/fx</sup>* mice.

*Tnfr1*-1 5'-GGATTGTCACGGTGCCGTTGAAG-3';  
*Tnfr1*-2: 5'-TGACAAGGACACGGTGTGTGGC-3';  
*Tnfr1*-3: 5'-TGCTGATGGGGATACATCCATC-3',  
*Tnfr1*-4: 5'-CCGGTGGATGTGGAATGTGTG-3'.

These primers produce a 120bp product in *WT* and a 155bp product in *Tnfr1*-mutant mice.

*Tnfr2*-1: 5'-CCGGTGGATGTGGAATGTGTG-3';  
*Tnfr2*-2: 5'-AGAGCTCCAGGCACAAGGGC-3';  
*Tnfr2*-3: 5'-AACGGGCCAGACCTCGGGT-3'.

These primers produce a 257bp product in *WT* and a 160bp product in *Tnfr2*-mutant mice.

*Ifn $\gamma$* -1: 5'- CCT TCT ATC GCC TTC TTG ACG-3'

*Ifn $\gamma$* -2: 5'- AGA AGT AAG TGG AAG GGC CCA GAA G -3'

*Ifn $\gamma$* -3: 5'- AGG GAA ACT GGG AGA GGA GAA ATA T-3'

These primers produce a 500bp product in *WT* and a 210bp product in *Ifn $\gamma$* -mutant mice

*Rip3*-1: 5'- CGCTTTAGAAGCCTTCAGGTTGAC-3'

*Rip3*-2: 5'- GCAGGCTCTGGTGACAAGATTCATGG-3'

*Rip3*-3: 5'- CCAGAGGCCACTTGTGTAGCG-3'.

These primers produce a 700bp product in *WT* and a 450bp product in *Rip3*-mutant mice.

## Additional Methods

**Detection of the percentage of cells with *Tak1* deletion ( $\Delta$ *Tak1*) in mouse BM.** Lin<sup>-</sup> HSPCs, Lin<sup>+</sup> differentiated hematopoietic cells and CD3<sup>+</sup> T cells were isolated from BM of *Tak1*<sup>mut</sup>, *Tak1*<sup>mut</sup>*Tnfr*<sup>-/-</sup>, *Tak1*<sup>mut</sup>*Tnfr*<sup>-/-</sup>*Ifn $\gamma$* <sup>-/-</sup> and *Tak1*<sup>mut</sup>*Tnfr*<sup>-/-</sup>*Rip3*<sup>-/-</sup> mice at the indicated time points. Genomic DNA was extracted from these cells. Quantitative PCR was performed to detect  $\Delta$ *Tak1* in these cells using the primers: 5'-GCAACTTCGACAACCTTGCCTTCCTGTG-3' and 5'-GCACTTGAATTAGCGGCCGCAAGCTTAT AACT-3'. PCR using primers for the *Pten* gene (5'-CTCCTCTACTCCATTCTTCCC-3 and 5'-ACTCCCC CAATGAACAAAC-3) were used as endogenous controls for DNA input. DNA isolated from Lin<sup>-</sup> cells from wild-type mouse BM and DNA from a *Tak1*<sup>-/-</sup> leukemic cells (LCs) were used as negative and positive controls, respectively. The relative copy numbers of  $\Delta$ *Tak1* in each type of experimental cells were calculated as:  $\lg_2(\Delta$ *Tak1* Ct - *Pten* Ct). The percentage of  $\Delta$ *Tak1* cells in the experimental cells = (relative copies of  $\Delta$ *Tak1* in the experimental cells / relative copies of  $\Delta$ *Tak1* in *Tak1*<sup>-/-</sup> LCs)  $\times$  100.

**Antibodies used in these studies.** All antibodies were purchased from *eBioscience* (San Diego, CA, clone and catalog# follows for each): anti-CD4-eflour 450 (GK1.5, 48-0041), anti-*Ifn $\gamma$* -Alexa Fluor-488 (XMG1.2, 53-7311), anti-IL-17A-PE-Cy7(eBio17B7, 25-7177), anti-Tnf- $\alpha$ -PE(MP6-XT22, 12-7321), anti-IL-10-PerCp-Cy5.5 (JES5-16E3, 45-7101) and anti-IL-4-APC (17-7041, 17-7041), anti-CD8-FITC (53-6.7, 11-0081). Antibodies used for T cell activation include: anti-CD4-ef450 (GK1.5, 48-0041), anti-

CD69-PerCp-Cy5.5 (H1.2F3, 45-0691), anti-CD44-APC (IM7, 17-0441), and anti-CD62L-FITC (MEL-14, 11-0621); anti-CD3-ef450 (145-2C11, 48-0031), anti-CD8-ef780 (53-6.7, 47-0081). Antibodies used for stem cell analysis include: anti-Lin-FITC (CD3, 145-2C11, 11-0031; B220, RA3-6B2, 11-0452; GR1, RB6-8C5, 11-5931, CD8, 53-6.7, 11-0081, Ter119, TER-119, 11-5921), anti-Sca1-PE (D7, 12-5981), anti-c-kit-APC (2B8, 17-1171), anti-CD8-APC (53-6.7, 17-0081), anti-CD4-FITC (GK1.5, 17-0041), anti-CD41-FITC(MWReg30, 11-0411), and anti-Mac1-PE (M1/70, 12-0112).

**ELISA.** When mice were subjected to analyses for BM HPSCs and T cells, peripheral blood sera were collected and immediately stored at -80°C. Tnf $\alpha$  and Ifn $\gamma$  concentrations were determined using mouse ELISA kits (BioSource, Camarillo, CA) according to the manufacturer's protocol.

**T cell proliferation analysis.** T cells from spleens and lymph nodes were isolated by autoMACS using a pan-T cell isolation kit (Miltenyi Biotec). Cells were labeled with 1  $\mu$ M CFSE (V12883, Invitrogen) and cultured under specified conditions as indicated. The reductions of CFSE fluorescence were analyzed using FACS as the indicator of T cell division.

**T cells and APC co-culture.** Purified *WT* T cells were co-cultured with *WT* and *Tnfr<sup>-/-</sup>* APCs (T cell-depleted splenocytes irradiated at 2500 rad) under three conditions. 1) neutral condition: 3 $\mu$ g/ml anti-CD3, 3 $\mu$ g/ml anti-CD28, and 10 U/ml rmIL-2; 2) Th1 condition: 3  $\mu$ g/ml anti-CD3, 3  $\mu$ g/ml anti-CD28, and 1 U/ml rmIL-2, 10  $\mu$ g/ml anti-IL-4, and 3); or Th2 condition: 3  $\mu$ g/ml anti-CD3, 3  $\mu$ g/ml anti-CD28, and 10U/ml rmIL-2, 5 ng/ml rmIL-4, 10 $\mu$ g/ml anti-IL-12. All cytokines and antibodies were purchased from *eBiosciences* except for IL-12 which was obtained from *BioXcell*. After 1 week of culturing, cells were collected and stained for intracellular cytokines as described above.

***BrdU pulse-labeling for analyzing the proliferation of HSPCs.*** As we reported previously (He et al. 2004), mice were injected intraperitoneally with BrdU (10mg./kg. body weight) twice daily for 2 d. Forty-eight hours after the first injection, BM mononuclear cells (MNCs) were collected from mice and stained with FITC-conjugated lineage antibodies and PE-c-Kit. Cells were stained further with APC BrdU Flow Kits (BD Pharmingen) following the protocol provided by the vender. Percentage of BrdU<sup>+</sup> cells within Lin<sup>-</sup>c-kit<sup>+</sup> HSPCs was analyzed by flow cytometry.

***Annexin-V staining for death of HSPCs.*** As we reported previously<sup>3</sup>, BM MNCs were collected from mice at indicated time points and stained with FITC-conjugated lineage antibodies and PE-c-Kit. Cells were further stained with APC-Annexin-V Apoptosis Detection Kit (e-Bioscience) following the instructions provided by the vender. Percentage of Annexin<sup>+</sup> cells among Lin<sup>-</sup>c-kit<sup>+</sup> HSPCs was analyzed by flow-cytometry.

***In vitro co-culture of CD4<sup>+</sup> and CD8<sup>+</sup> T cells with HSPCs.*** Lin<sup>-</sup>Sca1<sup>+</sup>c-Kit<sup>+</sup> HSPCs were isolated from WT C57Bl6/J mice. CD4<sup>+</sup> T cells and CD8<sup>+</sup> T cells were isolated from *Tak1<sup>mut</sup>Tnfr<sup>-/-</sup>* BMF mice and WT control mice (all mice were maintained in a C57Bl6/J background). HSPCs and T cells were mixed in a 1:5 ratio and co-cultured in *StemSpan*<sup>TM</sup> serum-free medium containing 100ng/ml SCF, 20ng/ml TPO and 20ng/ml FLT3L and 25ng/ml mIL2 in the presence or absence of 20ng/ml Ifn $\gamma$  for 5 days. Proliferation, survival and differentiation of HSPCs were analyzed.

***MDSC functional assay.*** Isolated WT T cells were labeled with CFSE and activated with plate-bound anti-CD3 (1 $\mu$ g/ml) and soluble anti-CD28 (0.5 $\mu$ g/ml) for 24 hours. MDSCs (CD11b<sup>+</sup>Gr1<sup>+</sup> cells) were sorted from BM and mixed with the activated T cells at the indicated ratios. Cells were cultured for 6

days. On days 3 and 6, cells were stained with anti-CD3-eFluor 450 and subjected to FACS analysis for the CFSE intensity.

## References

- 1 Zhang, J. *et al.* p27 maintains a subset of leukemia stem cells in the quiescent state in murine MLL-leukemia. *Mol Oncol*, doi:10.1016/j.molonc.2013.07.011 (2013).
- 2 Currier, J. R. & Robinson, M. A. Spectratype/immunoscope analysis of the expressed TCR repertoire. *Current protocols in immunology / edited by John E. Coligan ... [et al.] Chapter 10*, Unit 10 28, doi:10.1002/0471142735.im1028s38 (2001).
- 3 Tang, M. *et al.* TAK1 is required for the survival of hematopoietic cells and hepatocytes in mice. *J Exp Med* (2008).
