# Supplementary material
Source: PubMed Central journal article supplement (PMC5286937)
Supplement: 2016_151514-Disclosures_and_Contributions.pdf [file 2016_151514-Disclosures_and_Contributions.pdf]

Haematologica  
HAEMATOL/2016/151514  
Version 3

Necroptosis in spontaneously-mutated hematopoietic cells induces  
autoimmune bone marrow failure in mice

Junping Xin, Peter Breslin, Wei Wei, Jing Li, Rafael Gutierrez, Joseph Cannova, Allen Ni, Grace Ng, Rachel Schmidt, Haiyan Chen, Vamsi Parini, Paul C. Kuo, Ameet R. Kini, Patrick Stiff, Jiang Zhu, and Jiwang Zhang

Disclosures: This work was supported by US Department of Defense grant (BM120072) and NIH grants (R01HL95896 and R21CA181970) to J.Z. through Loyola University Chicago, and also by the Leukemia Research Foundation New Investigator Award (8th Annual George Richard Memorial Grant) to J.X. J.X. was also supported in part by a grant from the Muscular Dystrophy Association (MDA202906).

Contributions: JX designed the experiments, analyzed the data, and wrote the manuscript. JZ supervised the overall research, analyzed the data, and edited the manuscript. PB designed and conducted experiments, and also edited and refined the manuscript. JX, AN, RG, JL, JC, GN, RS, WW, PB, HC, VP, AK, PK, PS, JZhu and JZ collectively contributed to data collection and the interpretation of the results.
